# Supplementary material for: Monochromatic light-enhanced photocatalytic CO2 reduction based on exciton properties of two-dimensional lead halide perovskites
Source: Royal Society of Chemistry journal article supplement (doi:10.1039/d2dt00972b), 2022-01-01
Supplement: d2dt00972b1.pdf [file d2dt00972b1.pdf]

Supporting Information

# **Monochromatic light-enhanced photocatalytic CO<sub>2</sub> reduction based on exciton properties of two-dimensional lead halide perovskites**

Shengqi Xu,<sup>a</sup> Lu Yang,<sup>a</sup> Yixuan Wei,<sup>a</sup> Yiming Jia,<sup>a</sup> Meiqi Hu,<sup>a</sup> Lianxia Bai,<sup>b</sup> Junzheng Zhang,<sup>b</sup>  
Xinxin Li,<sup>c</sup> Shuo Wei<sup>\*a</sup> and Jun Lu<sup>b</sup>

<sup>a</sup>. College of Chemistry, Beijing Normal University, Beijing 100875, P. R. China.

<sup>b</sup>. State Key Laboratory of Chemical Resource Engineering, Beijing University of Chemical Technology, Beijing 100029, P. R. China.

<sup>c</sup>. Analytic and Testing Center, Beijing Normal University, Beijing 100875, P. R. China.

\*corresponding author: vshuo@bnu.edu.cn.

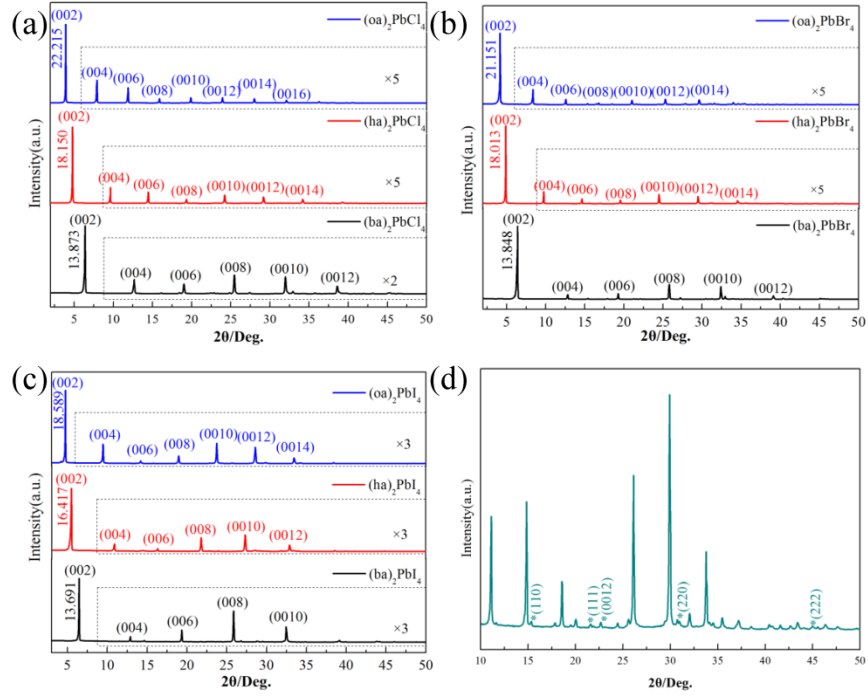

**Figure S1.** XRD patterns of (a-c)  $L_2PbX_4$  ( $L = ba, ha, oa$ ;  $X = Cl, Br, I$ ); (b) The local enlargement XRD pattern for  $(ha)_2CsPb_2Br_7$  with the angles ranging from  $10^\circ \sim 50^\circ$ .

**Table S1.** The main XRD peak data of  $(ha)_2CsPb_2Br_7$

| 2θ(deg.) | (hkl)  | $d_{hkl}(\text{Å})$ |
|----------|--------|---------------------|
| 3.73     | (002)  | 23.720              |
| 11.11    | (006)  | 7.9608              |
| 14.84    | (008)  | 5.8905              |
| 15.33    | (110)  | 5.7781              |
| 18.58    | (0010) | 4.7759              |
| 21.59    | (111)  | 4.0715              |
| 22.66    | (0012) | 3.9236              |
| 26.12    | (0014) | 3.4113              |
| 29.93    | (0016) | 2.9450              |
| 30.97    | (220)  | 2.8678              |
| 33.78    | (0018) | 2.6532              |
| 44.87    | (222)  | 2.0255              |

**Table S2.** Elemental analysis and ICP for  $L_2Cs_{n-1}Pb_nX_{3n+1}$  (L = ba, ha, oa; X = Cl, Br, I;  $n = 1, 2$ )

| <b>Perovskites</b> |                    | <b>C<br/>(wt%)</b> | <b>H<br/>(wt%)</b> | <b>N<br/>(wt%)</b> | <b>Pb<br/>(<math>\mu\text{g/mL}</math>)</b> |
|--------------------|--------------------|--------------------|--------------------|--------------------|---------------------------------------------|
| $(ba)_2PbCl_4$     | Calculated value   | 19.40              | 4.48               | 5.66               | 39.82                                       |
|                    | Elemental analysis | 19.03              | 4.16               | 5.21               | 38.54                                       |
| $(ha)_2PbCl_4$     | Calculated value   | 26.14              | 5.48               | 5.08               | 69.14                                       |
|                    | Elemental analysis | 25.7               | 5.287              | 4.97               | 69.44                                       |
| $(oa)_2PbCl_4$     | Calculated value   | 31.633             | 6.305              | 4.611              | 40.929                                      |
|                    | Elemental analysis | 31.37              | 6.344              | 4.57               | 42.04                                       |
| $(ba)_2PbBr_4$     | Calculated value   | 14.28              | 3.294              | 4.16               | 38.171                                      |
|                    | Elemental analysis | 14.21              | 3.297              | 4.15               | 38.13                                       |
| $(ha)_2PbBr_4$     | Calculated value   | 19.77              | 4.15               | 3.84               | 46.60                                       |
|                    | Elemental analysis | 19.61              | 4.36               | 3.83               | 44.71                                       |
| $(oa)_2PbBr_4$     | Calculated value   | 24.471             | 4.877              | 3.567              | 22.163                                      |
|                    | Elemental analysis | 25.00              | 5.211              | 3.66               | 21.6                                        |
| $(ba)_2PbI_4$      | Calculated value   | 11.159             | 2.575              | 3.253              | 39.46                                       |
|                    | Elemental analysis | 10.73              | 2.646              | 3.11               | 38.92                                       |
| $(ha)_2PbI_4$      | Calculated value   | 15.714             | 3.297              | 3.054              | 57.83                                       |
|                    | Elemental analysis | 15.98              | 3.423              | 3.13               | 56.57                                       |
| $(oa)_2PbI_4$      | Calculated value   | 19.744             | 3.935              | 2.878              | 33.21                                       |
|                    | Elemental analysis | 18.89              | 4.045              | 2.78               | 31.53                                       |
| $(ha)_2CsPb_2Br_7$ | Calculated value   | 11.01              | 2.31               | 2.14               | 51.918                                      |
|                    | Elemental analysis | 11.12              | 2.425              | 2.15               | 50.48                                       |

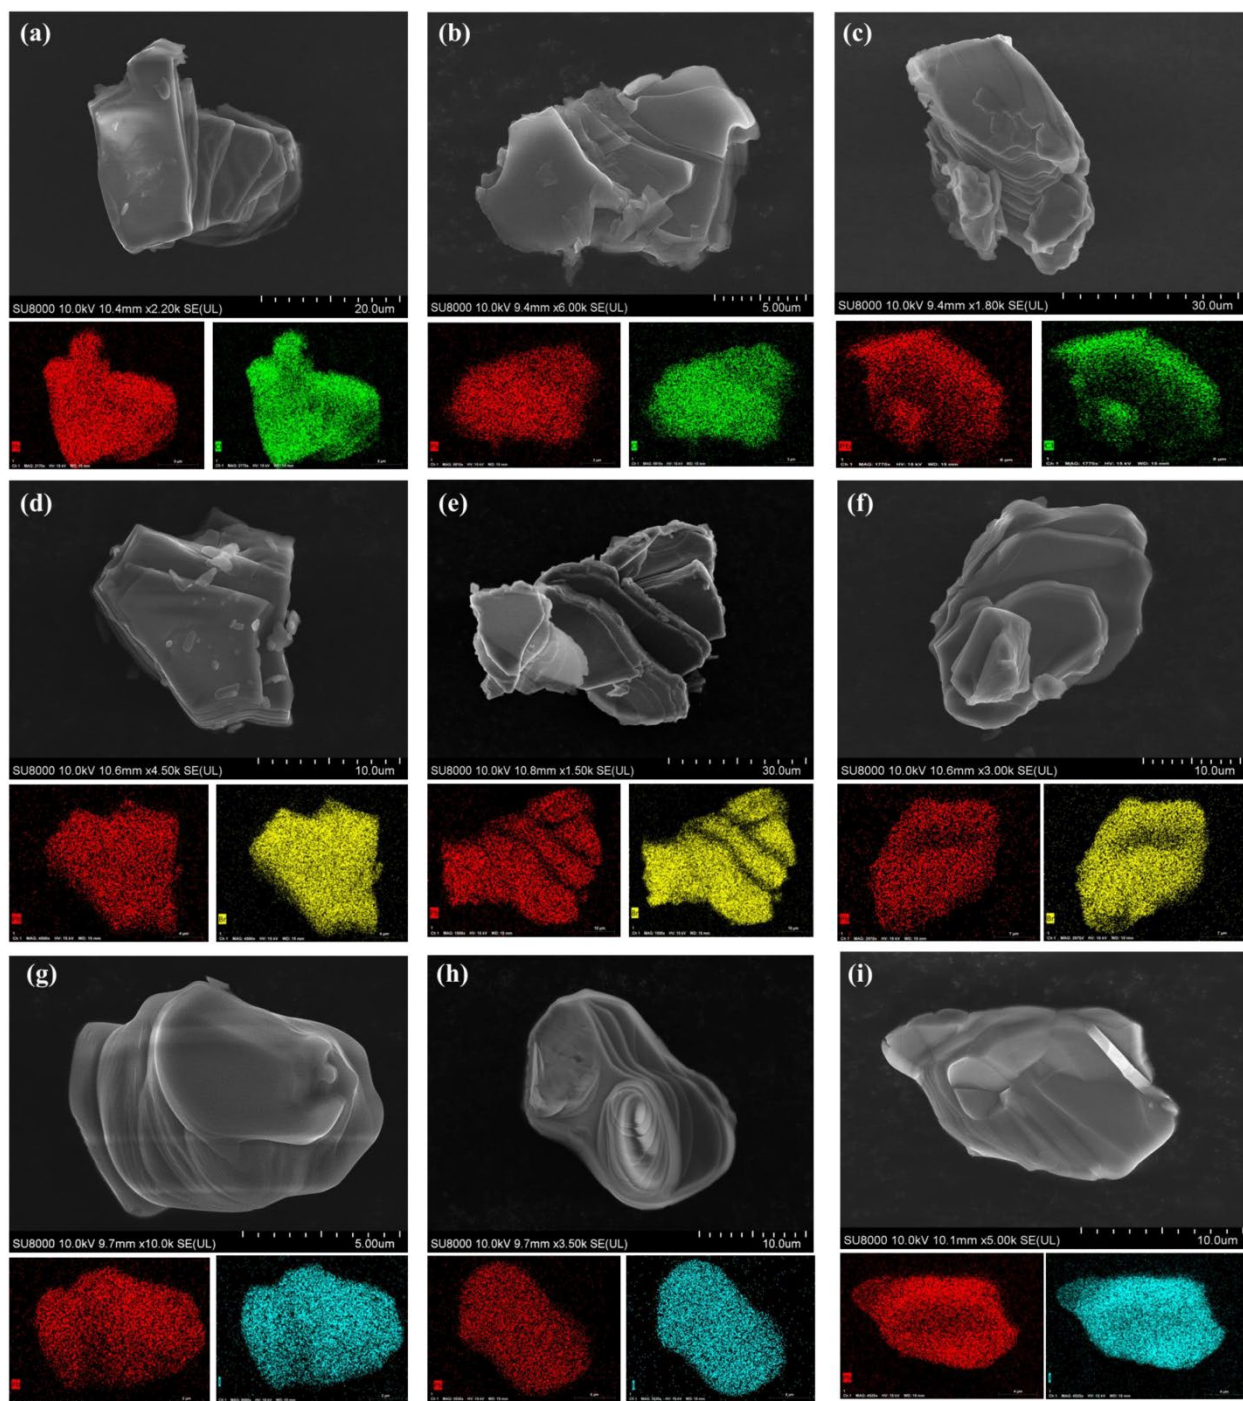

**Figure S2.** SEM and EDS images of (a)  $(ba)_2PbCl_4$ , (b)  $(ha)_2PbCl_4$ , (c)  $(oa)_2PbCl_4$ , (d)  $(ba)_2PbBr_4$ , (e)  $(ha)_2PbBr_4$ , (h)  $(oa)_2PbBr_4$ , (g)  $(ba)_2PbI_4$ , (h)  $(ha)_2PbI_4$  and (i)  $(oa)_2PbI_4$ . Corresponding element mapping in SEM image Pb (red), Cl (green), Br (yellow) and I (blue).

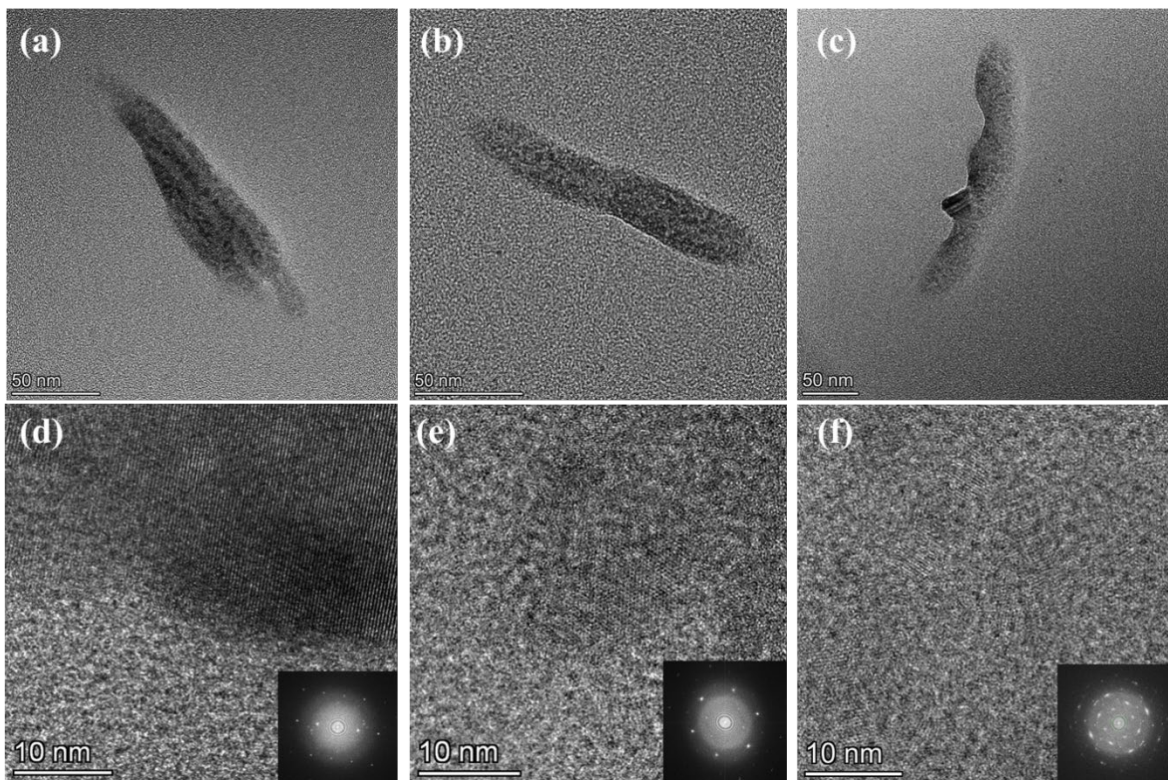

**Figure S3.** TEM images(a-c) , HRTEM images(d-f) (the right bottom panel is FFT pattern) of (a)  $(\text{ha})_2\text{PbCl}_4$ , (b)  $(\text{ha})_2\text{PbBr}_4$  and (c)  $(\text{ha})_2\text{PbI}_4$ .

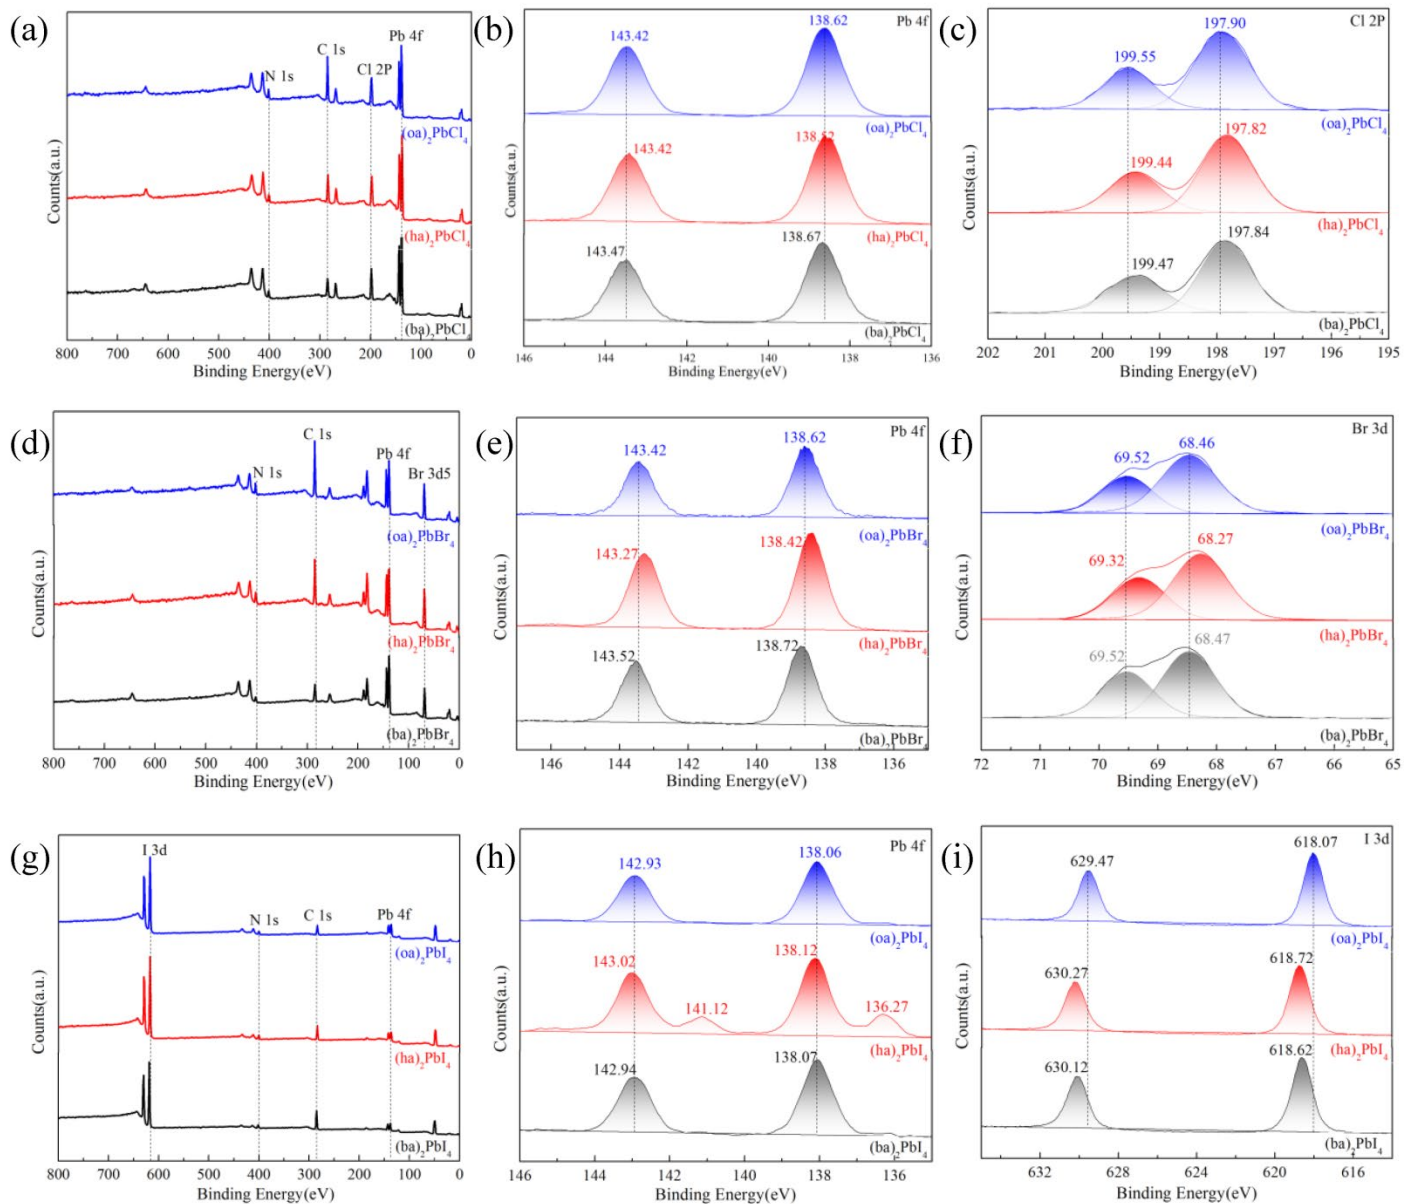

**Figure S4.** XPS spectra corresponding to (a,d,g) survey, (b,e,h) Pb 4f, (c)Cl 2P, (f)Br 3d and (i)I 3d of  $L_2PbCl_4$ (a-c),  $L_2PbBr_4$ (d-f) and  $L_2PbI_4$ (g-i)( $L = ba, ha, oa$ ). The binding energy is calibrated with the C 1s peak (284.5 eV) of free carbon.

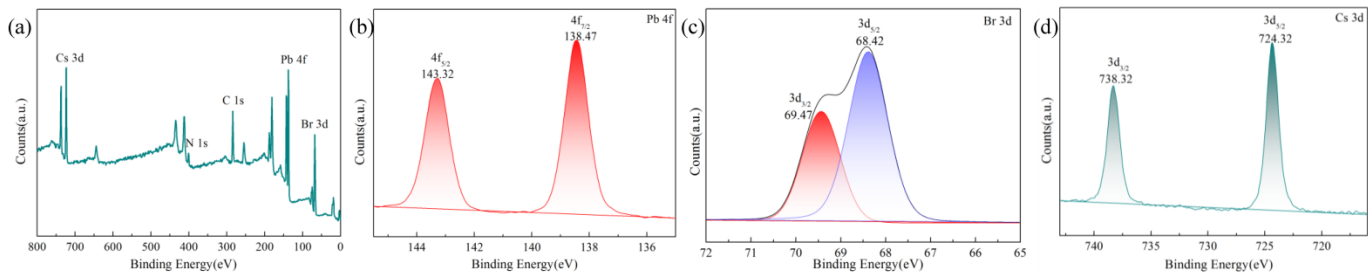

**Figure S5.** XPS spectra of (ha)<sub>2</sub>CsPb<sub>2</sub>Br<sub>7</sub> (a)survey, (b)Pb 4f, (c)Br 3d and (d)Cs 3d. The binding energy is calibrated with the C 1s peak (284.5 eV) of free carbon.

**Table S3.** Quantitative XPS analysis of L<sub>2</sub>Cs<sub>n-1</sub>Pb<sub>n</sub>X<sub>3n+1</sub>(L = ba, ha, oa; X = Cl, Br, I; n = 1, 2).

| Perovskites                                         | Atomic Ratio (%) |       |      |
|-----------------------------------------------------|------------------|-------|------|
|                                                     | Pb               | X     | Cs   |
| (ba) <sub>2</sub> PbCl <sub>4</sub>                 | 10.18            | 38.55 |      |
| (ha) <sub>2</sub> PbCl <sub>4</sub>                 | 8.18             | 31.6  |      |
| (oa) <sub>2</sub> PbCl <sub>4</sub>                 | 5.22             | 20.96 |      |
| (ba) <sub>2</sub> PbBr <sub>4</sub>                 | 8.33             | 31.45 |      |
| (ha) <sub>2</sub> PbBr <sub>4</sub>                 | 4.11             | 17.15 | /    |
| (oa) <sub>2</sub> PbBr <sub>4</sub>                 | 3.51             | 16.21 |      |
| (ba) <sub>2</sub> PbI <sub>4</sub>                  | 4.47             | 18.71 |      |
| (ha) <sub>2</sub> PbI <sub>4</sub>                  | 2.48             | 12.18 |      |
| (oa) <sub>2</sub> PbI <sub>4</sub>                  | 1.56             | 6.86  |      |
| (ha) <sub>2</sub> CsPb <sub>2</sub> Br <sub>7</sub> | 6.34             | 24.93 | 3.47 |

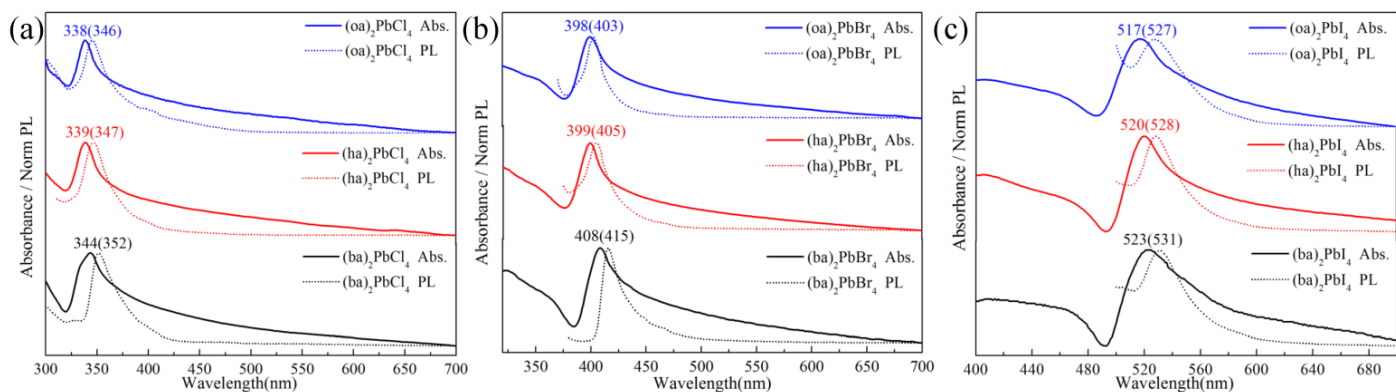

**Figure S6.** UV-vis absorption(solid line) and PL emission spectra(dotted line) of (a)L<sub>2</sub>PbCl<sub>4</sub>, (b) L<sub>2</sub>PbBr<sub>4</sub>, (c) L<sub>2</sub>PbI<sub>4</sub>(L = ba, ha, oa)

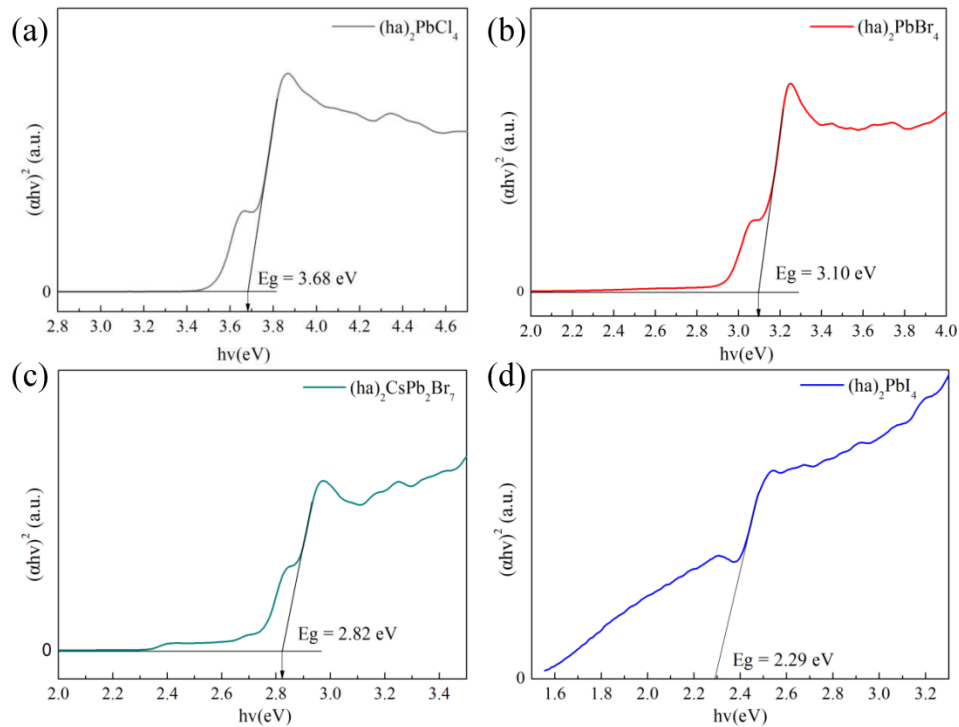

**Figure S7.** Tauc plots of (a)( $\text{ha}$ ) $_2\text{PbCl}_4$  (b) ( $\text{ha}$ ) $_2\text{PbBr}_4$  (c) ( $\text{ha}$ ) $_2\text{CsPb}_2\text{Br}_7$  (d) ( $\text{ha}$ ) $_2\text{PbI}_4$

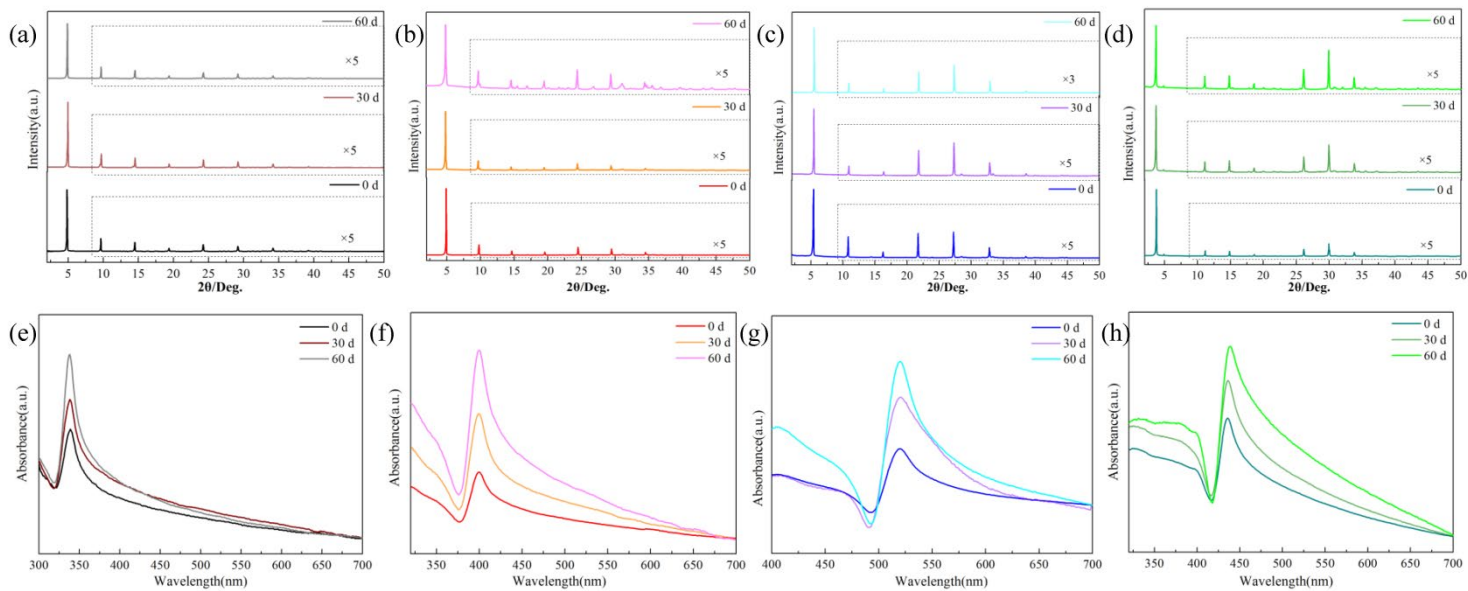

**Figure S8.** XRD patterns of (a)( $\text{ha}$ ) $_2\text{PbCl}_4$  (b) ( $\text{ha}$ ) $_2\text{PbBr}_4$  (c) ( $\text{ha}$ ) $_2\text{PbI}_4$  (d) ( $\text{ha}$ ) $_2\text{CsPb}_2\text{Br}_7$  and corresponding to UV-vis absorption spectra(e-h) after several days under atmosphere environment.



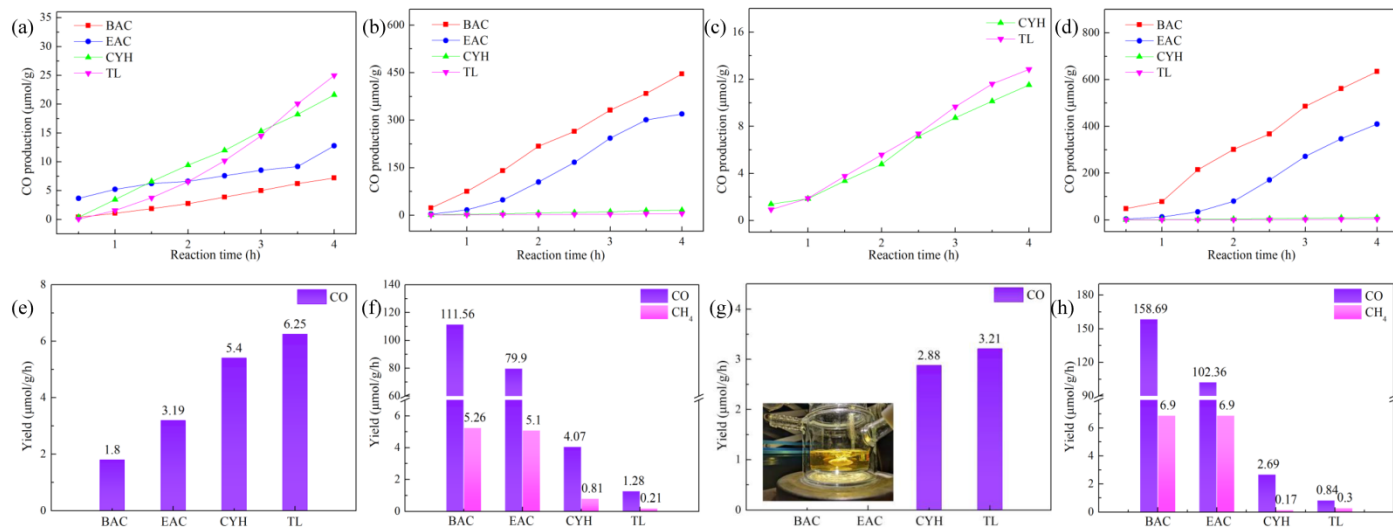

**Figure S9.** Photocatalytic evolution of CO for photocatalytic catalyst in various solvents (300 W Xe lamp, with the light intensity of 400 mW and the light source of full wavelength). (a)  $(\text{ha})_2\text{PbCl}_4$  (b)  $(\text{ha})_2\text{PbBr}_4$  (c)  $(\text{ha})_2\text{PbI}_4$  (d)  $(\text{ha})_2\text{CsPb}_2\text{Br}_7$  and corresponding to CO and  $\text{CH}_4$  yield after 4 h of photochemical reaction(e-h).

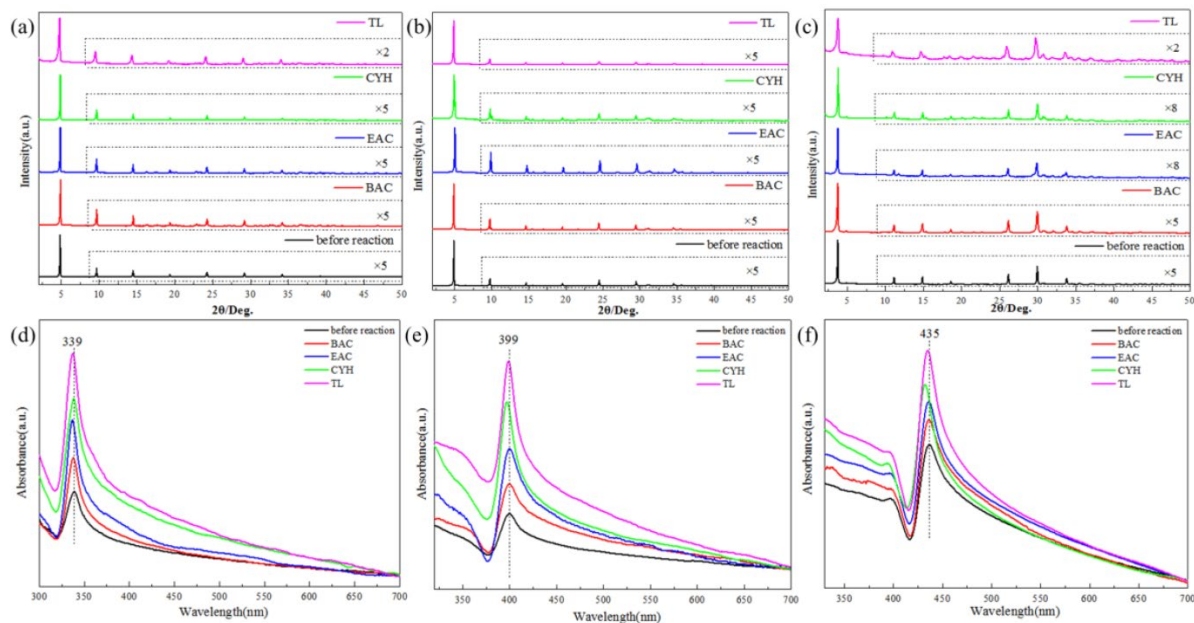

**Figure S10.** XRD patterns of (a)  $(\text{ha})_2\text{PbCl}_4$  (b)  $(\text{ha})_2\text{PbBr}_4$  (c)  $(\text{ha})_2\text{CsPb}_2\text{Br}_7$  in various solvents and corresponding to UV-vis absorption spectra(d-f) after 4 h of photochemical reaction (300 W Xe lamp, with the light intensity of 400 mW and the light source of full wavelength).

**Table S4.** Summary of reported photocatalytic CO<sub>2</sub> reduction performance.(Most of them are perovskite-based photocatalysts)

| Photocatalyst                                                                                                                          | conditions                                    | Light source/Intensity                                | Products / $\mu\text{mol}\cdot\text{g}^{-1}\cdot\text{h}^{-1}$ | Ref.      |
|----------------------------------------------------------------------------------------------------------------------------------------|-----------------------------------------------|-------------------------------------------------------|----------------------------------------------------------------|-----------|
| (ha) <sub>2</sub> CsPb <sub>2</sub> Br <sub>7</sub>                                                                                    | butyl acetate                                 | 300W Xe lamp<br>400 mW                                | CO, 158.69<br>CH <sub>4</sub> , 6.9                            | This work |
| Pt-CsPbBr <sub>3</sub> /Bi <sub>2</sub> WO <sub>6</sub>                                                                                | ethyl acetate<br>/isopropanol                 | 150W Xe Lamp<br>AM 1.5G<br>150 mW/cm <sup>-2</sup>    | CO, 17.2<br>CH <sub>4</sub> , 34.4<br>H <sub>2</sub> , 7.4     | S1        |
| CsPbBr <sub>3</sub> /Cs <sub>4</sub> PbBr <sub>6</sub><br>Co <sub>1%</sub> @<br>CsPbBr <sub>3</sub> /Cs <sub>4</sub> PbBr <sub>6</sub> | acetonitrile/ water/<br>methanol              | 300W Xe Lamp<br>100 mW/cm <sup>-2</sup>               | CO, 45.2<br>CO, 122.33                                         | S2        |
| CsPbBr <sub>3</sub>                                                                                                                    | ethyl acetate/water and<br>acetonitrile/water | 300W Xe lamp<br>>420 nm                               | CO, <10<br>CH <sub>4</sub> , <10                               | S3        |
| CsPbBr <sub>3</sub> /g-C <sub>3</sub> N <sub>4</sub>                                                                                   | acetonitrile/water<br>ethyl acetate/water     |                                                       | CO, 148.9<br>CO, <70                                           |           |
| Mn/CsPb(Br/Cl) <sub>3</sub>                                                                                                            | ethyl acetate                                 | 300W Xe Lamp<br>AM 1.5G                               | CO, 213<br>CH <sub>4</sub> , 9.1                               | S4        |
| CsPbBr <sub>3</sub> -Glycine                                                                                                           | gas (CO <sub>2</sub> +H <sub>2</sub> O)       | 300W Xe lamp<br>100 mW/cm <sup>-2</sup>               | CO, 27.7                                                       | S5        |
| CsPbBr <sub>3</sub>                                                                                                                    | ethyl acetate                                 | 300W Xe Lamp<br>AM 1.5G                               | CO, 15<br>CH <sub>4</sub> , 6.7                                | S6        |
| CsPb(Br <sub>0.5</sub> /Cl <sub>0.5</sub> ) <sub>3</sub>                                                                               |                                               |                                                       | CO, 85.2<br>CH <sub>4</sub> , 12                               |           |
| CsPbBr <sub>3</sub> /g-C <sub>3</sub> N <sub>4</sub>                                                                                   | deionized water                               | 300W Xe Lamp                                          | CO, 6.1                                                        | S7        |
| CsPbBr <sub>3</sub> /g-C <sub>3</sub> N <sub>4</sub>                                                                                   | toluene                                       | 300W Xe lamp<br>>420 nm                               | CO, 28.5                                                       | S8        |
| CsPbBr <sub>3</sub>                                                                                                                    | gas (CO <sub>2</sub> +H <sub>2</sub> O)       | 300W Xe lamp<br>100 mW/cm <sup>-2</sup>               | CO, 21.6                                                       | S9        |
| CsPbBr <sub>3</sub>                                                                                                                    | acetonitrile/water                            | 300W Xe lamp<br>>420 nm                               | CO, 7.78<br>CH <sub>4</sub> , 3.93                             | S10       |
| C <sub>60</sub> /CsPbBr <sub>3</sub>                                                                                                   |                                               | 150 mW/cm <sup>-2</sup>                               | CO, 17.83<br>CH <sub>4</sub> , 6.83                            |           |
| Cs <sub>4</sub> Pb <sub>3</sub> Br <sub>10</sub> (n = 3);<br>Cs <sub>5</sub> Pb <sub>4</sub> Br <sub>13</sub> (n = 4)                  | gas (CO <sub>2</sub> +H <sub>2</sub> O)       | 300W Xe lamp<br>AM 1.5G<br>100 mW/cm <sup>-2</sup>    | CO, 25.96; 38.27<br>CH <sub>4</sub> , 2.67; 2.88               | S11       |
| Cs <sub>4</sub> Pb <sub>3</sub> Br <sub>10</sub> /RGO;<br>Cs <sub>5</sub> Pb <sub>4</sub> Br <sub>13</sub> /RGO                        |                                               |                                                       | CO, 54.82; 81.39<br>CH <sub>4</sub> , 4.20; 3.86               |           |
| Cs <sub>3</sub> Sb <sub>2</sub> (Br <sub>0.7</sub> I <sub>0.3</sub> ) <sub>9</sub>                                                     | gas (CO <sub>2</sub> +H <sub>2</sub> O)       | 300W Xe lamp<br>>420 nm                               | CO, 27.7                                                       | S12       |
| Cs <sub>3</sub> Bi <sub>2</sub> Br <sub>9</sub>                                                                                        | isopropanol                                   | 300W Xe lamp<br>200-1100 nm<br>70 mW/cm <sup>-2</sup> | CO, 8.58<br>CH <sub>4</sub> , 5.36                             | S13       |
| Cs <sub>2</sub> AgBiBr <sub>6</sub>                                                                                                    |                                               |                                                       | CO, 7.34<br>CH <sub>4</sub> , 0.75                             |           |
| ZnFe <sub>2</sub> O <sub>4</sub> /Ag/TiO <sub>2</sub>                                                                                  | H <sub>2</sub> O                              | 200 Hg lamp<br>150mW cm <sup>-2</sup>                 | CO, 1025<br>CH <sub>4</sub> , 132<br>CH <sub>3</sub> OH, 31    | S14       |
| CuNi/C                                                                                                                                 | TEOA-H <sub>2</sub> O                         | 300 W Xe lamp                                         | CO, 11.205<br>CH <sub>4</sub> , 0.9                            | S15       |

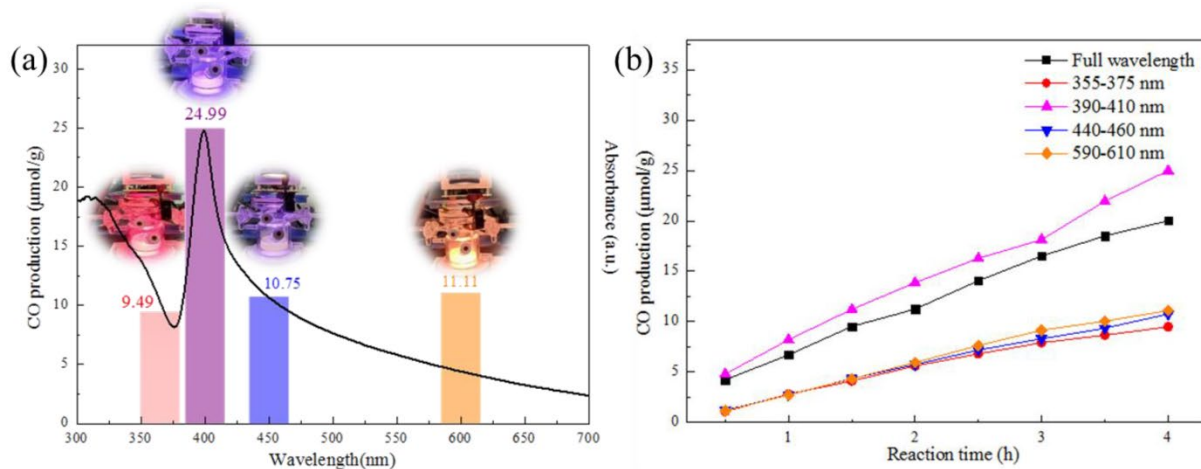

**Figure S11.** (a) UV-vis absorption spectrum of  $(\text{ha})_2\text{PbBr}_4$  and CO yield under monochromatic sources after 4 h of photocatalytic reaction (the illustration show the corresponding monochromatic light sources); (b) Photocatalytic evolution of CO under monochromatic light sources (300 W Xe lamp, with the light intensity of 50 mW).

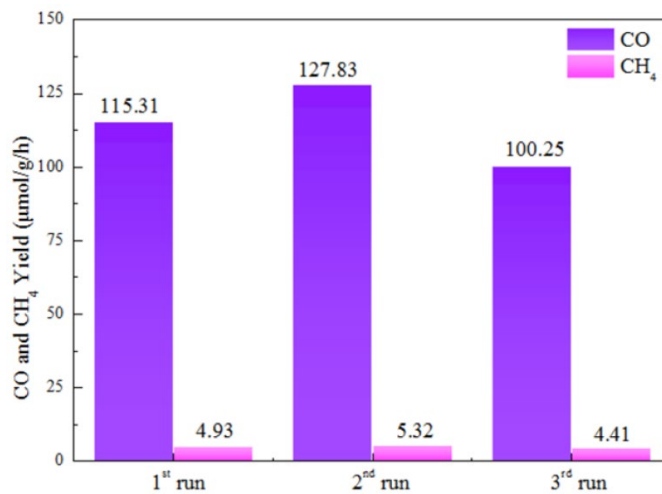

**Figure S12.** CO and  $\text{CH}_4$  yield of  $(\text{ha})_2\text{CsPb}_2\text{Br}_7$  as photocatalyst and BAC as solvent for three consecutive runs of 4 h each time (300 W Xe lamp, with the light intensity of 400 mW and the light source of full wavelength).

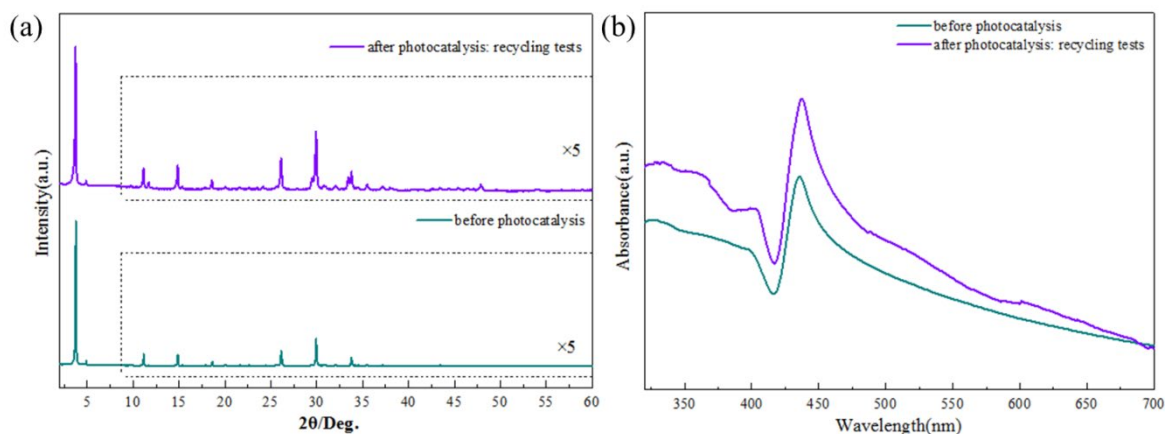

**Figure S13.** (a) XRD patterns and (b) UV-vis spectra of  $(\text{ha})_2\text{CsPb}_2\text{Br}_7$  after photocatalytic reaction (300 W Xe lamp, with the light intensity of 400 mW and the light source of full wavelength).

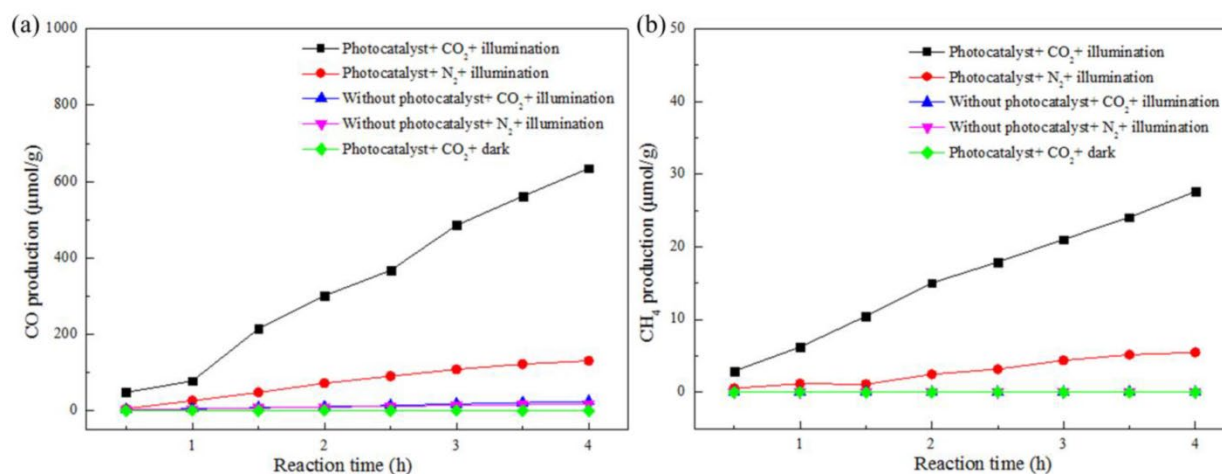

**Figure S14.** Photocatalytic evolution of products in different conditions with  $(\text{ha})_2\text{CsPb}_2\text{Br}_7$  as photocatalyst and BAC as solvent (300 W Xe lamp, with the light intensity of 400 mW and the light source of full wavelength). (a)CO and (b)CH<sub>4</sub>.

## REFERENCES

- S1 Y. Jiang, H. Y. Chen, J. Y. Li, J. F. Liao, H. H. Zhang, X. D. Wang and D. B. Kuang, *Adv. Funct. Mater.*, 2020, **30**, 2004293.
- S2 G. Dong, W. Zhang, Y. Mu, K. Su, M. Zhang and T. Lu, *Chem. Commun.*, 2020, **56**, 4664.
- S3 M. Ou, W. G. Tu, S. M. Yin, W. N. Xing, S. Y. Wu, H. J. Wang, S. P. Wan, Q. Zhong and R. Xu, *Angew. Chem. Int. Ed.*, 2018, **57**, 13570.
- S4 Y. Liu, S. Guo, S. You, C. Sun, X. Wang, L. Zhao and Z. Su, *Nanotechnology*, 2020, **31**, 215605.
- S5 Y. Xu, W. Zhang, K. Su, Y. X. Feng, Y. F. Mu, M. Zhang and T. B. Lu, *Chem. Eur. J.*, 2021, **27**, 2305.
- S6 S. Guo, J. Zhou, X. Zhao, C. Sun, S. You, X. Wang and Z. Su, *J. Catal.*, 2019, **369**, 201.
- S7 Y. Wang, Z. Liu, X. Tang, P. Huo, Z. Zhu, B. Yang and Z. Liu, *New J. Chem.*, 2021, **45**, 1082.
- S8 R. Cheng, H. Jin, M. B. J. Roeffaers, J. Hofkens and E. Debroye, *ACS Omega*, 2020, **5**, 24495.
- S9 L. Wu, M. Zhang, Y. Feng, W. Zhang, M. Zhang and T. Lu, *Solar RRL*, 2021, **5**, 2100263.
- S10 Z. Zhang, M. Shu, Y. Jiang and J. Xu, *Chem. Eng. J.*, 2021, **414**, 128889.
- S11 C. C. Lin, J. Y. Li, N. Z. She, S. K. Huang, C. Y. Huang, I. T. Wang, F. L. Tsai, C. Y. Wei, T. Y. Lee, D. Y. Wang, C. Y. Wen, S. S. Li, A. Yabushita, C. W. Luo, C. C. Chen and C. W. Chen, *Small*, 2022, 2107881.
- S12 D. F. Wu, B. J. Huo, Y. Y. Huang, X. S. Zhao, J. Y. Yang, K. Hu, X. C. Mao, P. He, Q. Huang and X. S. Tang, *Small*, 2022, **18**, 2106001.
- S13 Q. M. Sun, J. J. Xu, F. F. Tao, W. Ye, C. Zhou, J. H. He and J. M. Lu, *Angew. Chem. Int. Ed.*, 2022, e202200872.
- S14 Muhammad Tahir, *J. CO<sub>2</sub> Util.*, 2020, **37**, 134.
- S15 H. Jiang, S. Q. Gong, S. Xu, P. H. Shi, J. C. Fan, V. Cecen, Q. J. Xu, and Y. L. Min, *Dalton Trans.*, 2020, **49**, 5074.
